# Supplementary material for: Risk factors associated with an outbreak of COVID-19 in a meat processing plant in southern Germany, April to June 2020
Source: PubMed Central journal article supplement (PMC8973015; doi:10.2807/1560-7917.es.2022.27.13.2100354), 2022-03-31
Supplement: 21-00354_FINCI_Supplementary_material.pdf [file 21-00354_FINCI_Supplementary_material.pdf]

## Supplementary material

This supplementary material is hosted by *Eurosurveillance* as supporting information alongside the article ‘Risk factors associated with an outbreak of COVID-19 in a meat processing plant in southern Germany, April to June 2020’, on behalf of the authors, who remain responsible for the accuracy and appropriateness of the content. The same standards for ethics, copyright, attributions and permissions as for the article apply. Supplements are not edited by *Eurosurveillance* and the journal is not responsible for the maintenance of any links or email addresses provided therein.

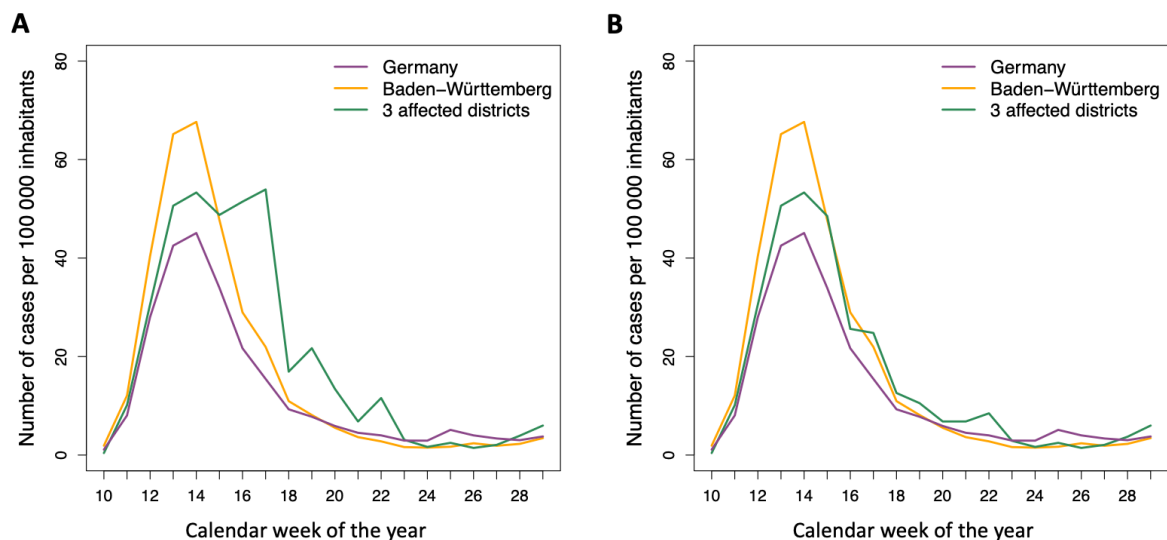

**Figure S1. Seven-day incidence of SARS-CoV-2 positive cases per 100 000 inhabitants in three affected districts, Baden-Württemberg and Germany, calendar week 10-29, 2020, A – includes all cases from the meat processing plant outbreak; B –cases from the meat processing plant outbreak are excluded from data of Baden-Württemberg and three affected districts**

**Table S1. Attack rates, univariable and multivariable analysis of risk factors for SARS-CoV-2 infection.** Case definition: RT-PCR positive result for SARS-CoV-2 or presence for IgG antibody

| Factor                                              |           | N total | % total | N case | AR (%) | RR (95% CI)      | pval          |
|-----------------------------------------------------|-----------|---------|---------|--------|--------|------------------|---------------|
| Nationality<br>N=1,220                              | German    | 248     | 20.3    | 52     | 21.0   | ref              |               |
|                                                     | Romanian  | 592     | 48.5    | 270    | 45.0   | 3.16 (2.25-4.5)  | <0.001**<br>* |
|                                                     | Hungarian | 159     | 12.9    | 96     | 39.4   | 2.47 (1.59-3.86) | <0.001**<br>* |
|                                                     | Polish    | 102     | 8.3     | 68     | 33.0   | 1.88 (1.12-3.14) | 0.015*        |
|                                                     | Croatian  | 29      | 2.4     | 3      | 10.3   | 0.43 (0.1-1.3)   | 0.186         |
|                                                     | Bulgarian | 21      | 1.7     | 4      | 19.0   | 0.89 (0.25-2.52) | 0.835         |
|                                                     | Iraqi     | 18      | 1.5     | 4      | 21.1   | 1.08 (0.3-3.15)  | 0.900         |
|                                                     | other     | 107     | 8.5     | 14     | 27.5   | 1.43 (0.7-2.79)  | 0.311         |
| Housing (N subcontracted employees living together) | 1         | 83      | 10.0    | 38     | 45.2   | ref              |               |
|                                                     | 2-4       | 71      | 8.6     | 25     | 33.8   | 0.64 (0.33-1.23) | 0.185         |
|                                                     | 5-9       | 55      | 6.7     | 29     | 52.7   | 1.32 (0.67-2.63) | 0.425         |
|                                                     | 10+       | 618     | 74.8    | 269    | 43.2   | 0.91 (0.58-1.45) | 0.697         |

|                                                                      |                |     |      |     |      |                  |       |
|----------------------------------------------------------------------|----------------|-----|------|-----|------|------------------|-------|
| N=827                                                                |                |     |      |     |      |                  |       |
| Distance to work – transport use (sub-contracted employees)<br>N=827 | Less than 1 km | 78  | 9.4  | 37  | 47.4 | ref              |       |
|                                                                      | More than 1 km | 749 | 90.6 | 324 | 42.7 | 0.84 (0.53-1.35) | 0.479 |

**Table S2. Comparison of PCR results and serological results for a subcohort of 777 meat processing plant employees**

|                       | PCR positive | PCR not positive | Total      |
|-----------------------|--------------|------------------|------------|
| <b>IgG positive</b>   | 142          | 58               | <b>200</b> |
| <b>IgG negative</b>   | 67           | 482              | <b>549</b> |
| <b>IgG borderline</b> | 18           | 10               | <b>28</b>  |
| <b>Total</b>          | <b>227</b>   | <b>550</b>       | <b>777</b> |
